# Supplementary material for: Tree Species Classification in a Complex Brazilian Tropical Forest Using Hyperspectral and LiDAR Data
Source: MDPI journal article supplement (doi:10.3390/f14050945), 2023-05-04

Supplementary Material

Figure S1. Spectra obtained from each tree for each species, from hyperspectral orthomosaics.

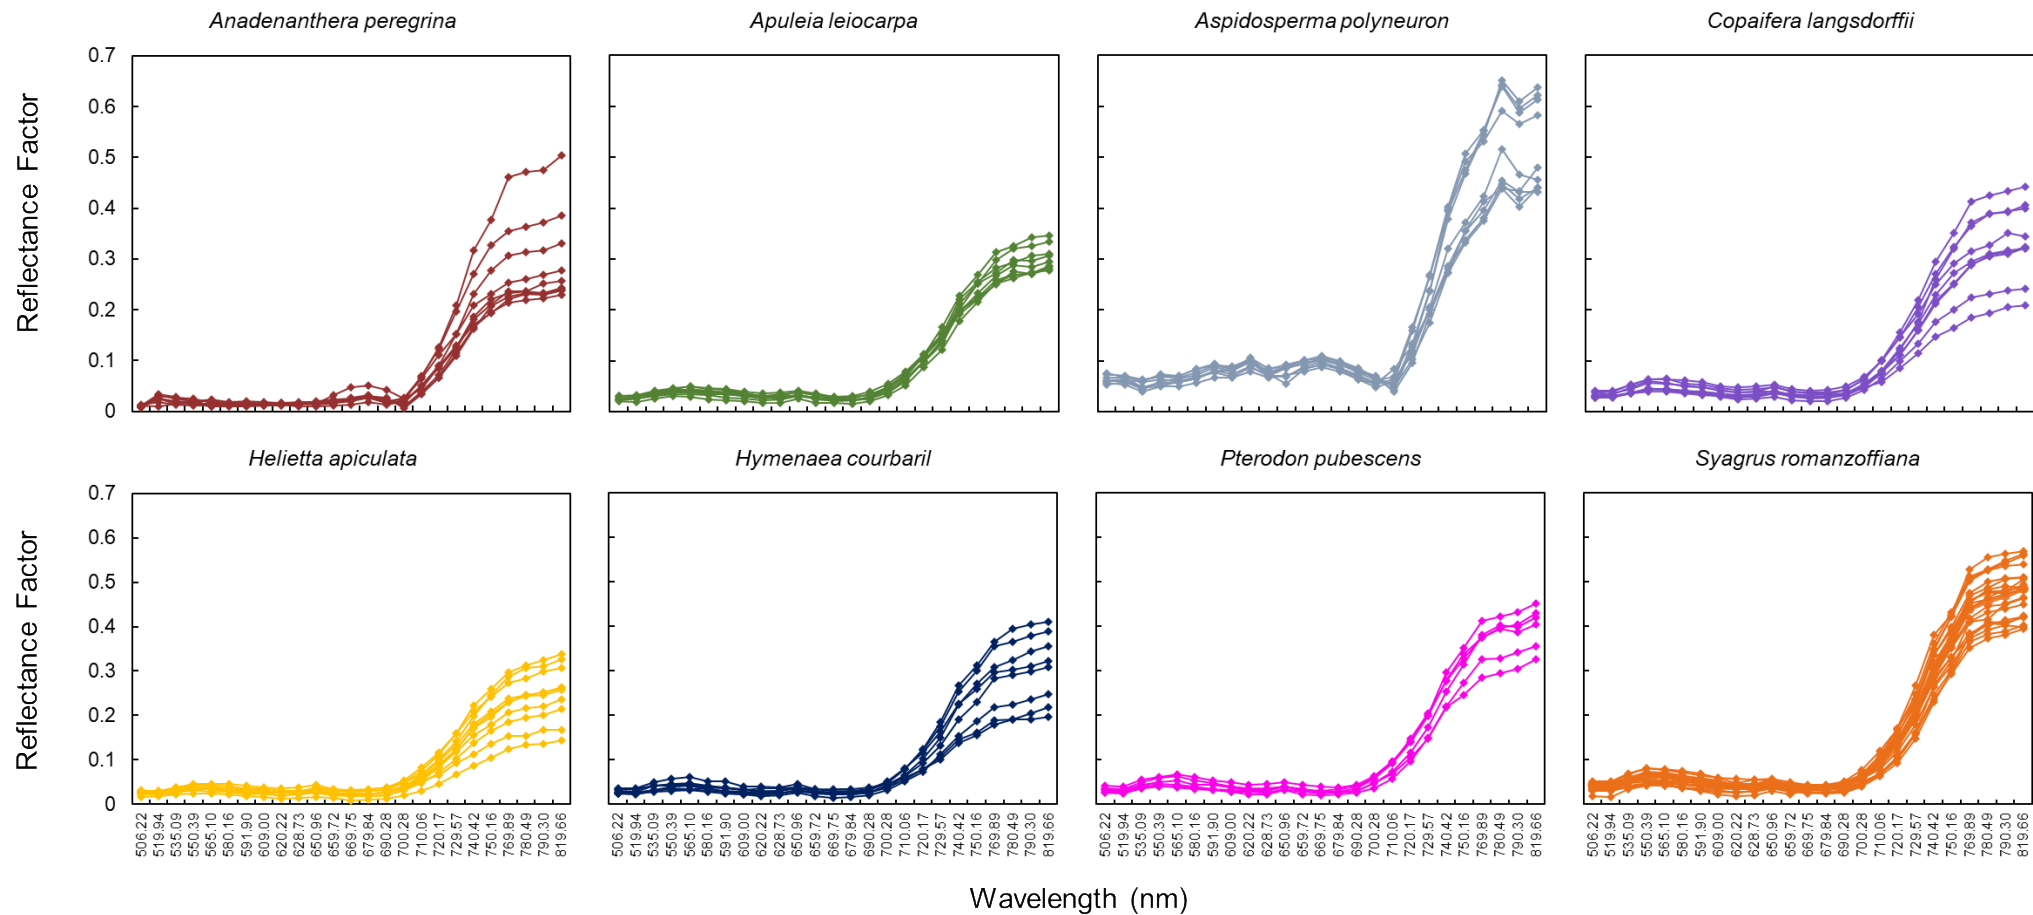

Figure S2. Distribution of species classified in the best scenario (S13). The segment colour represents the classification result, and the border colour refers to the correct field identification.

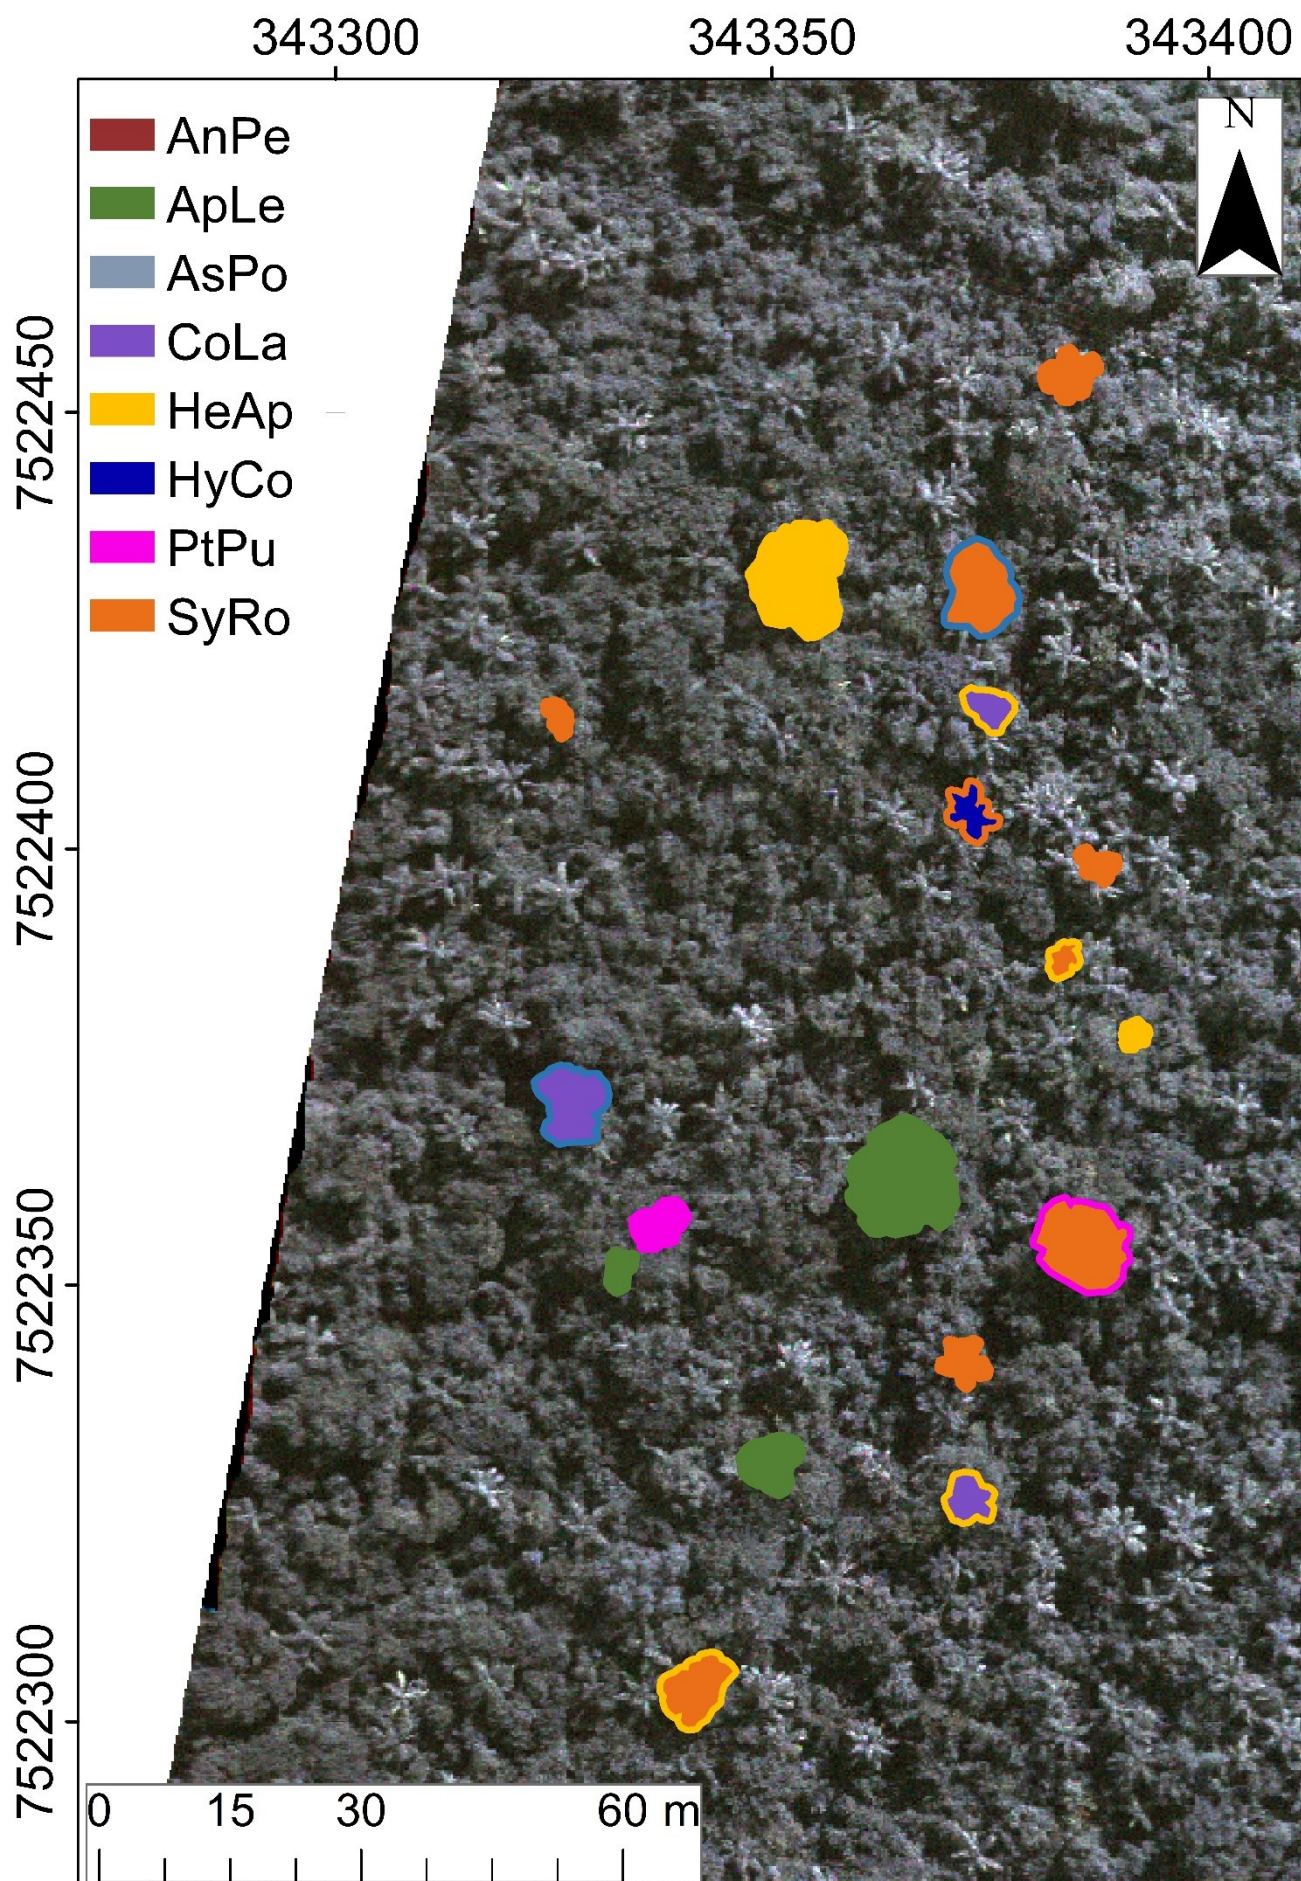



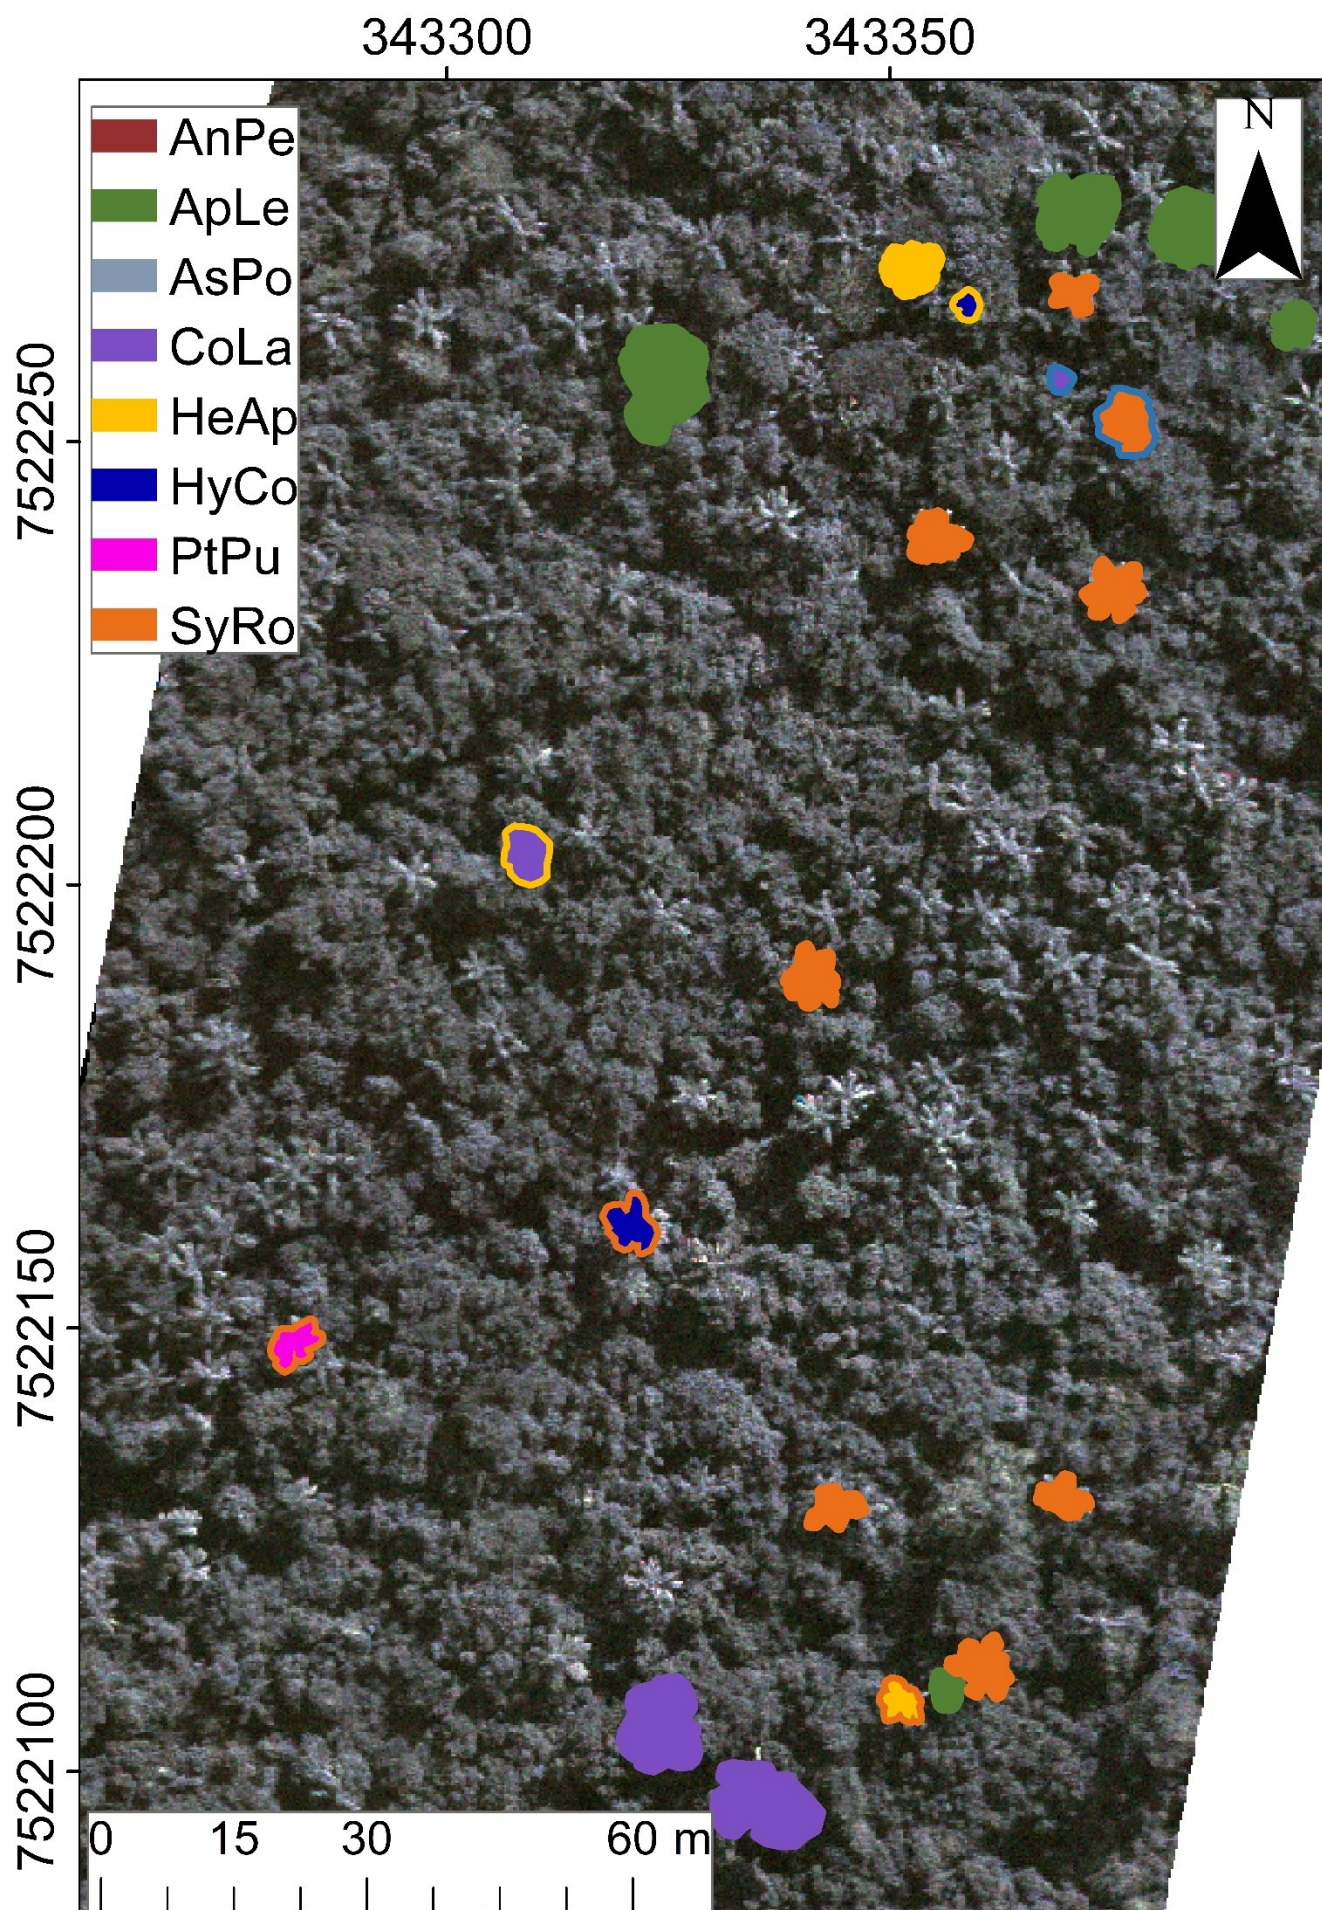



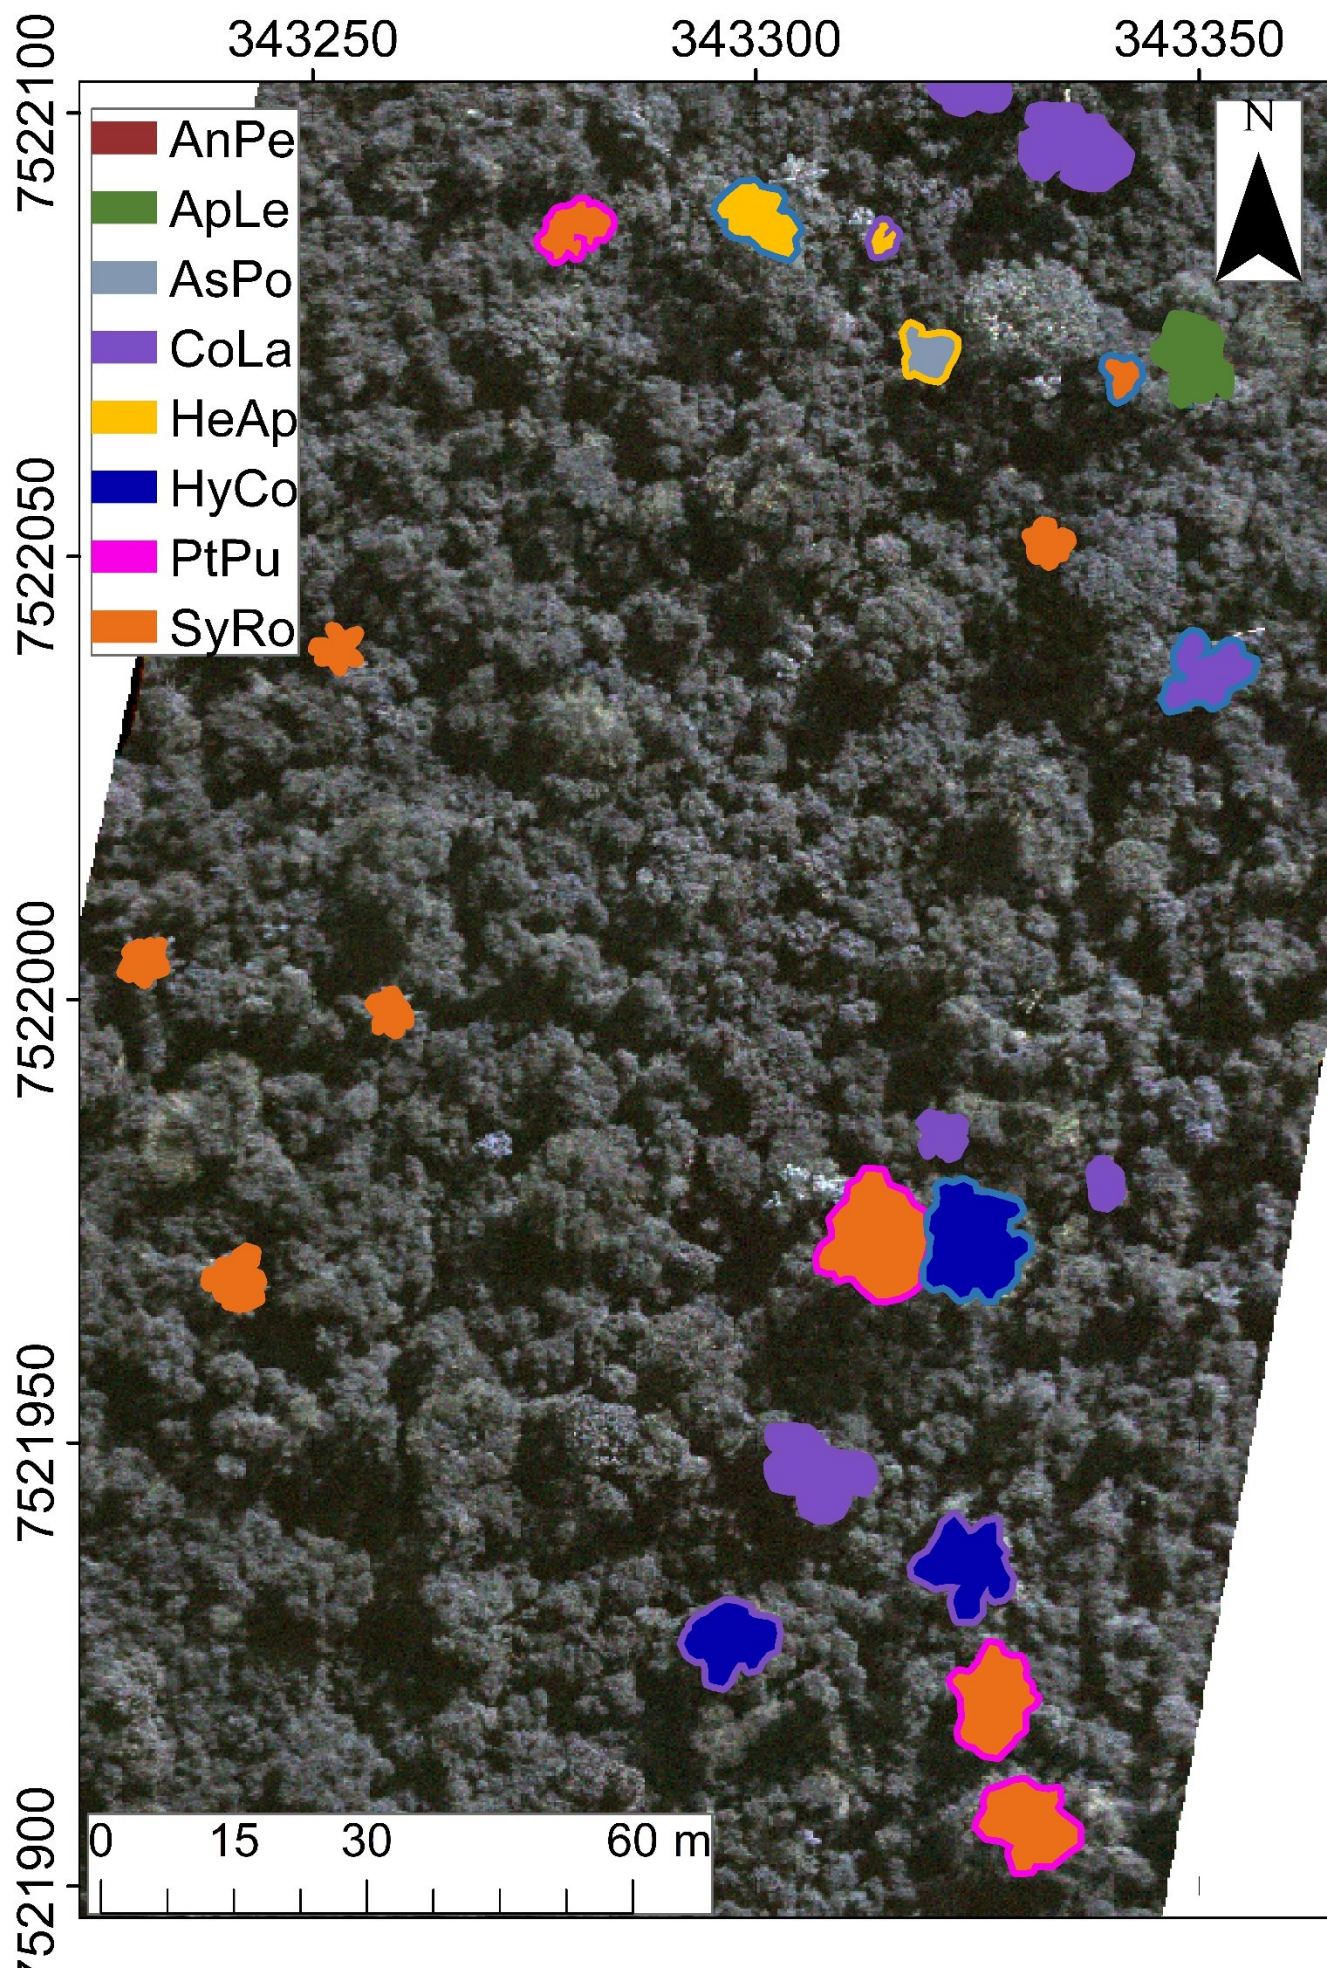



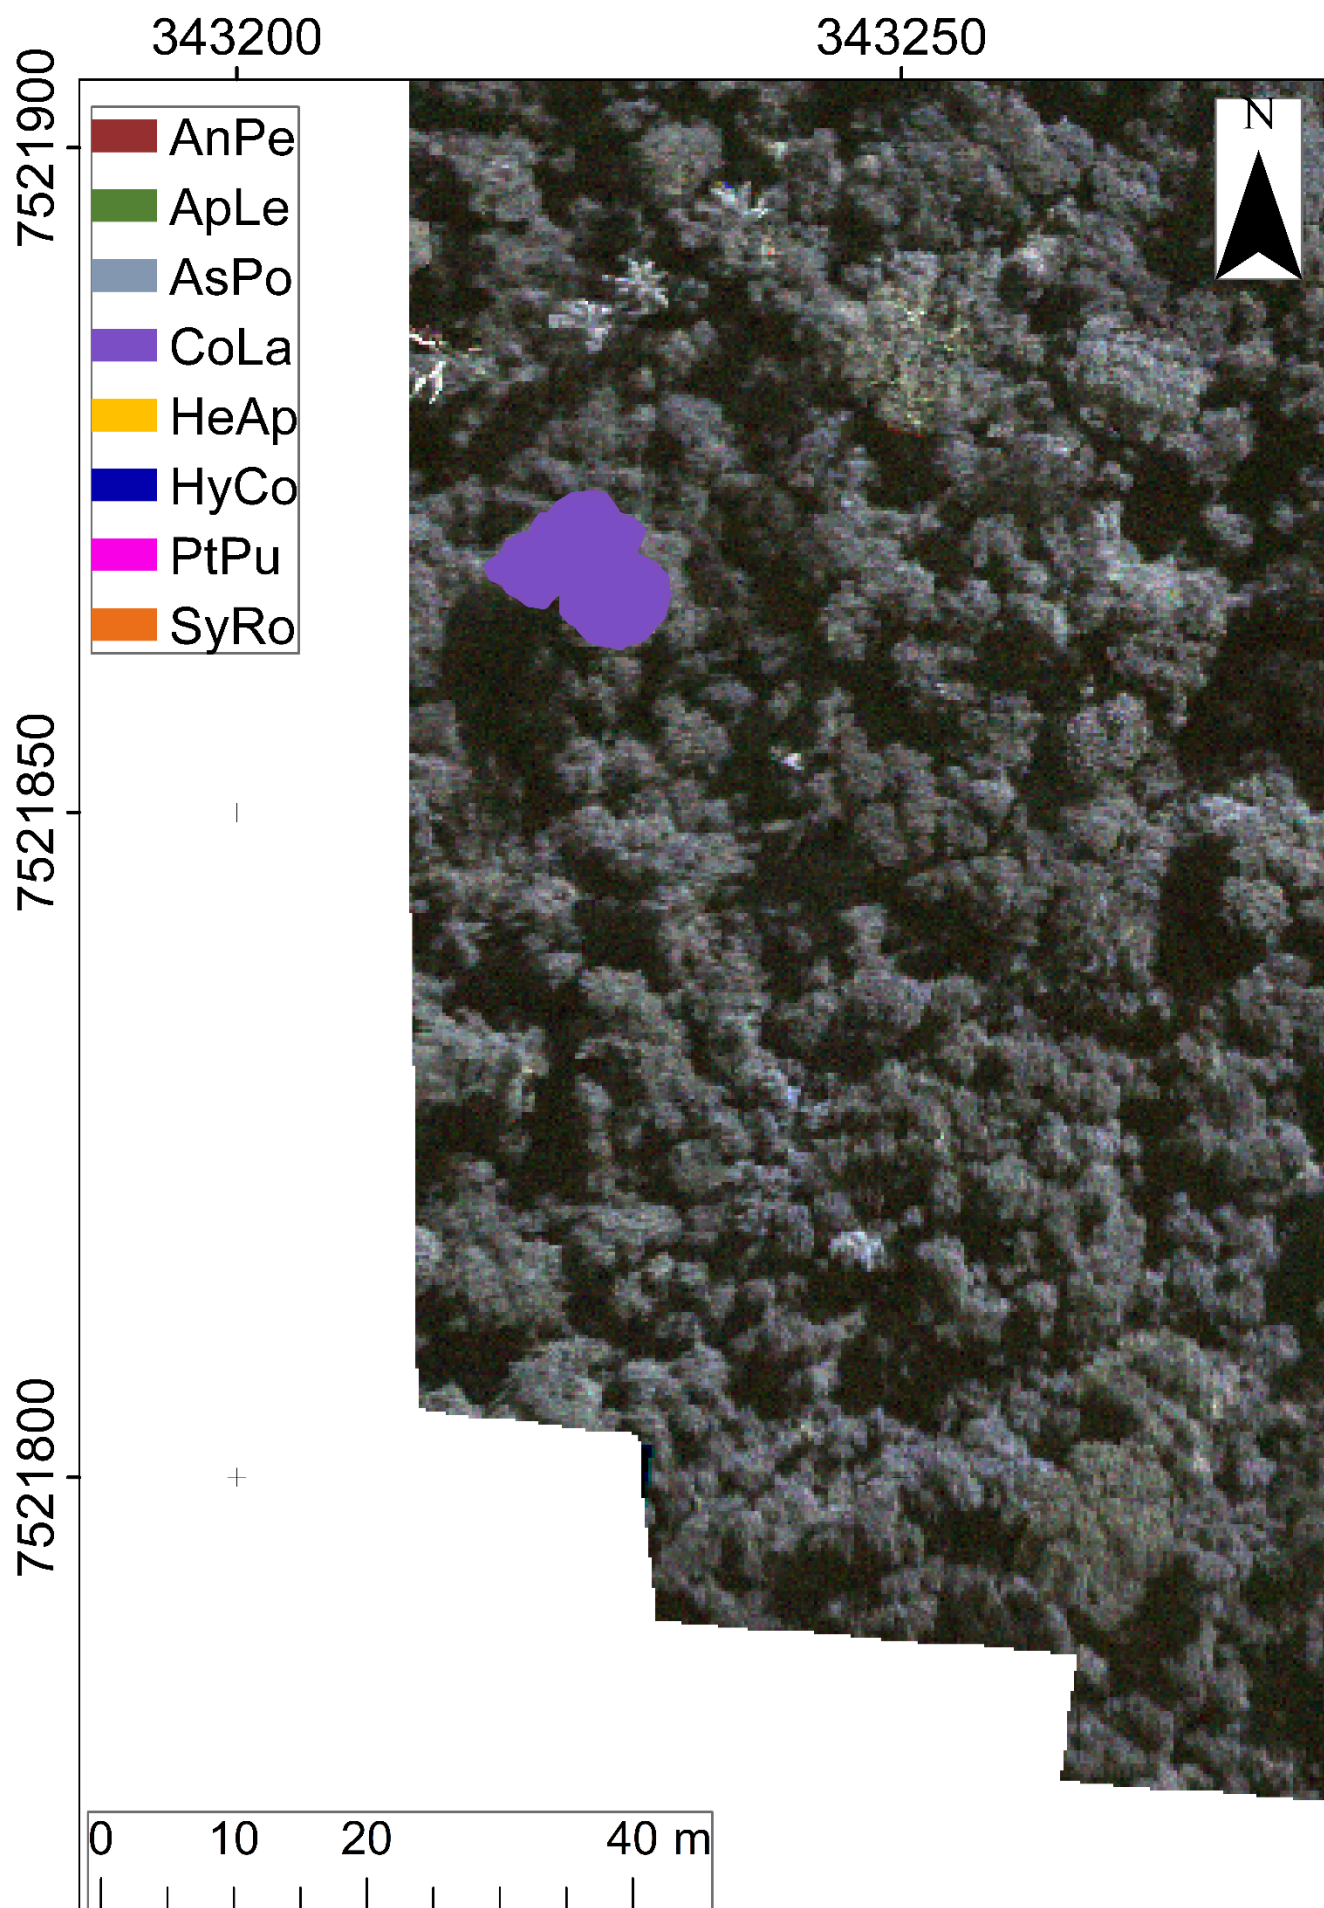

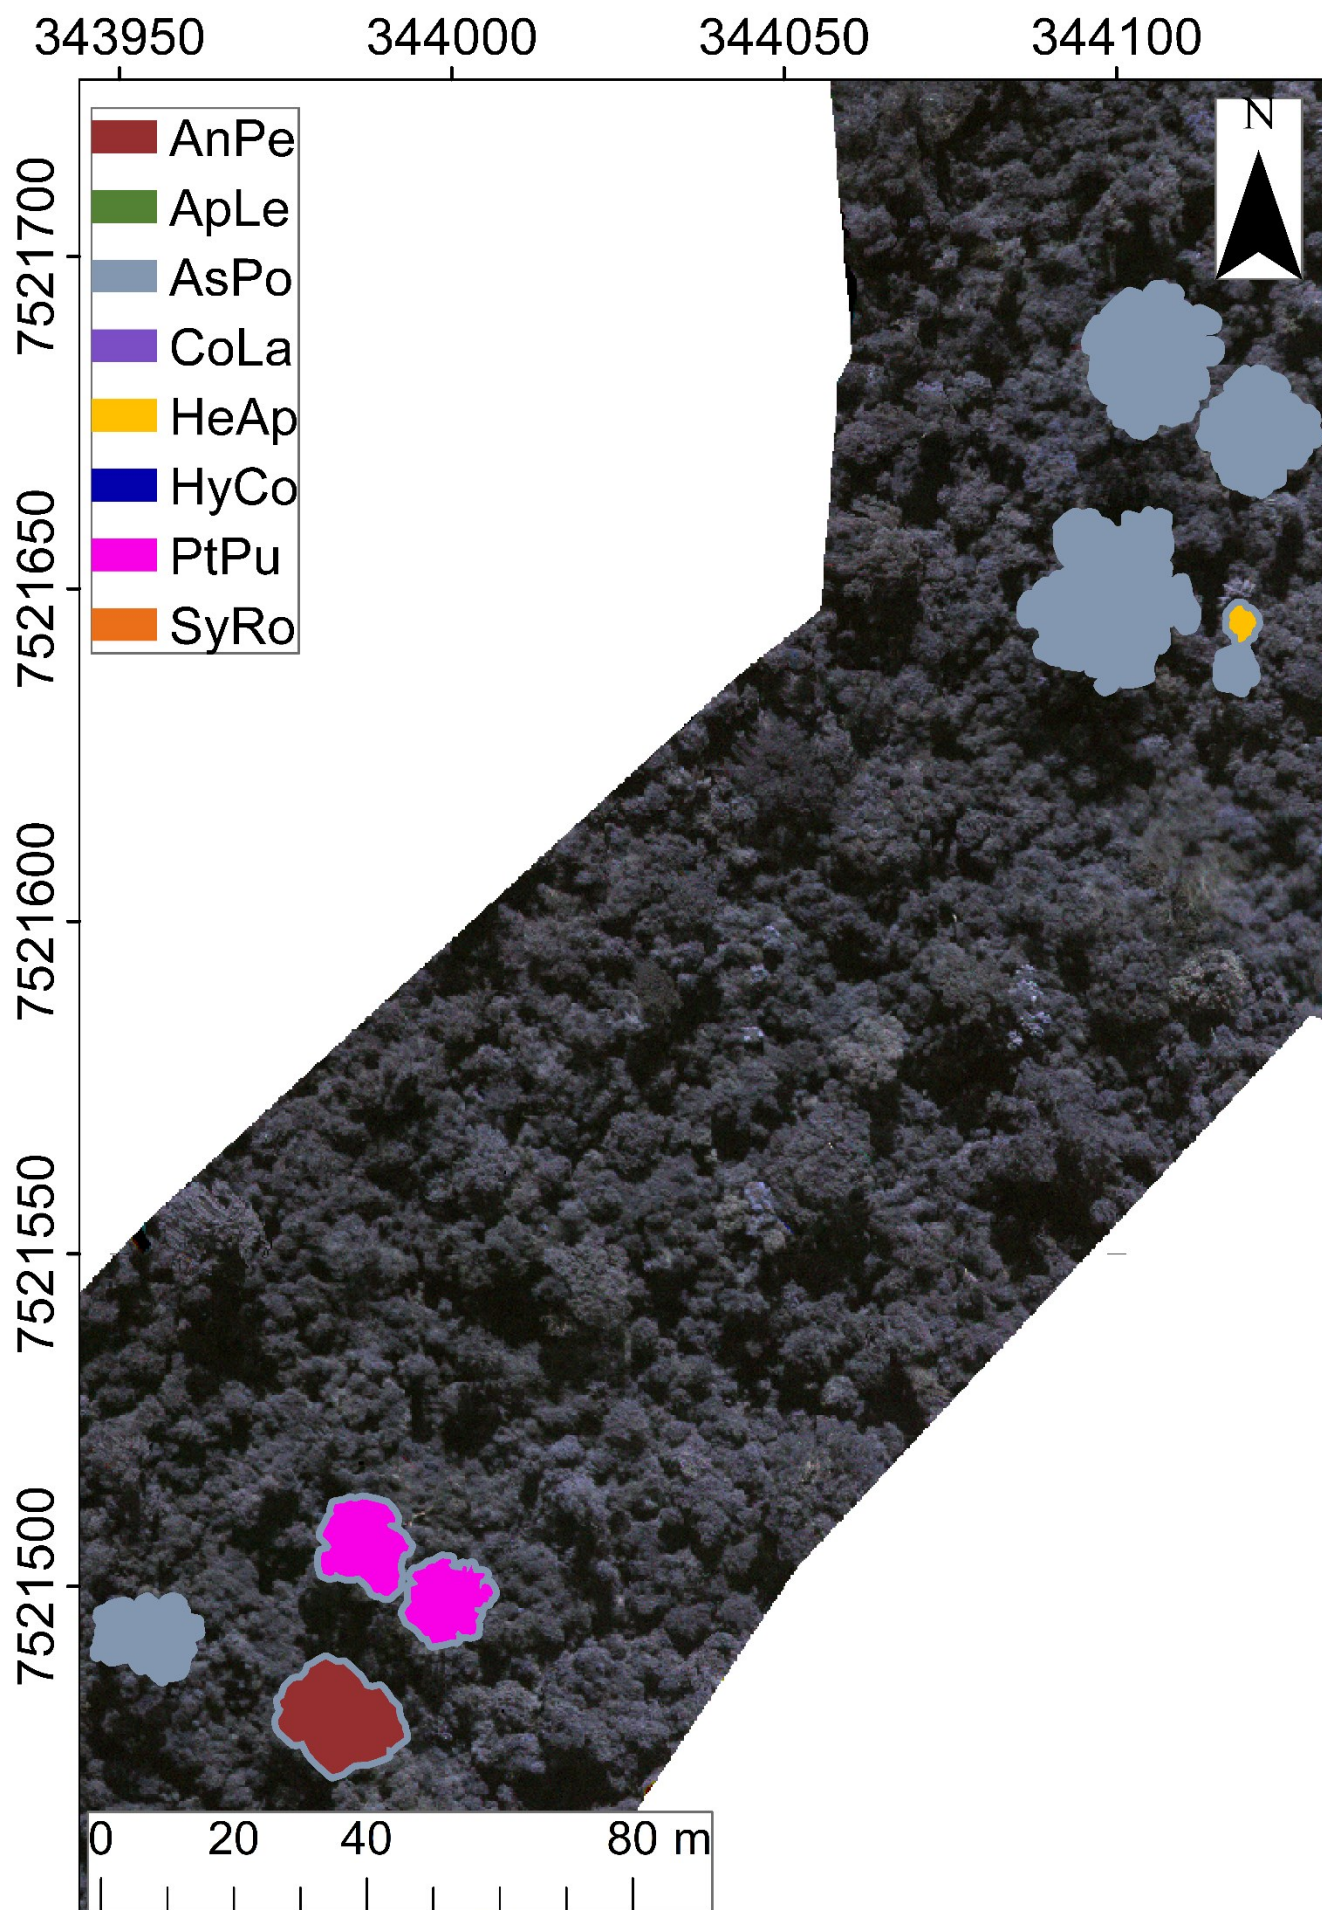



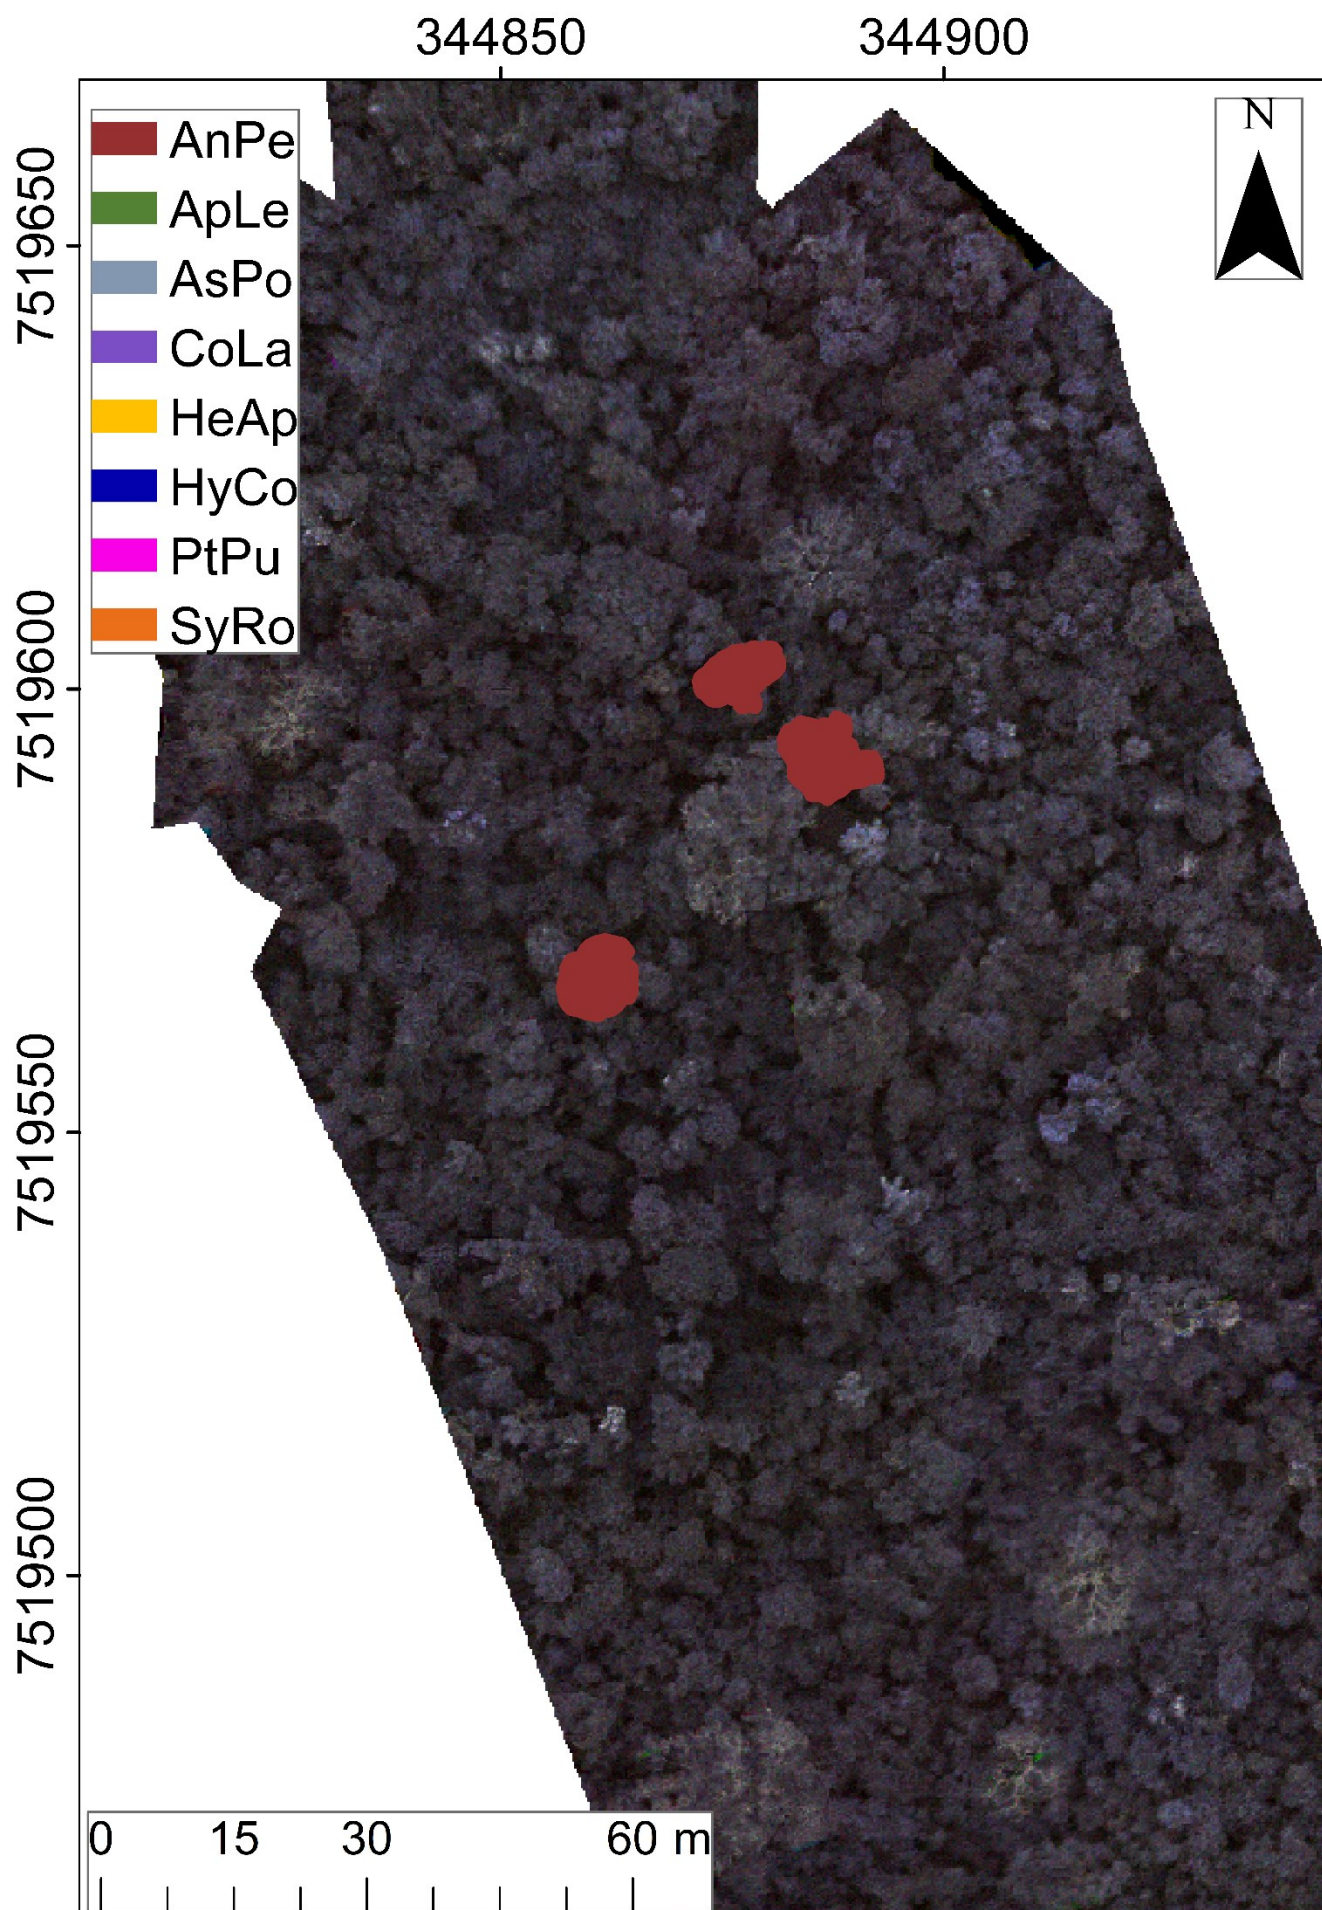



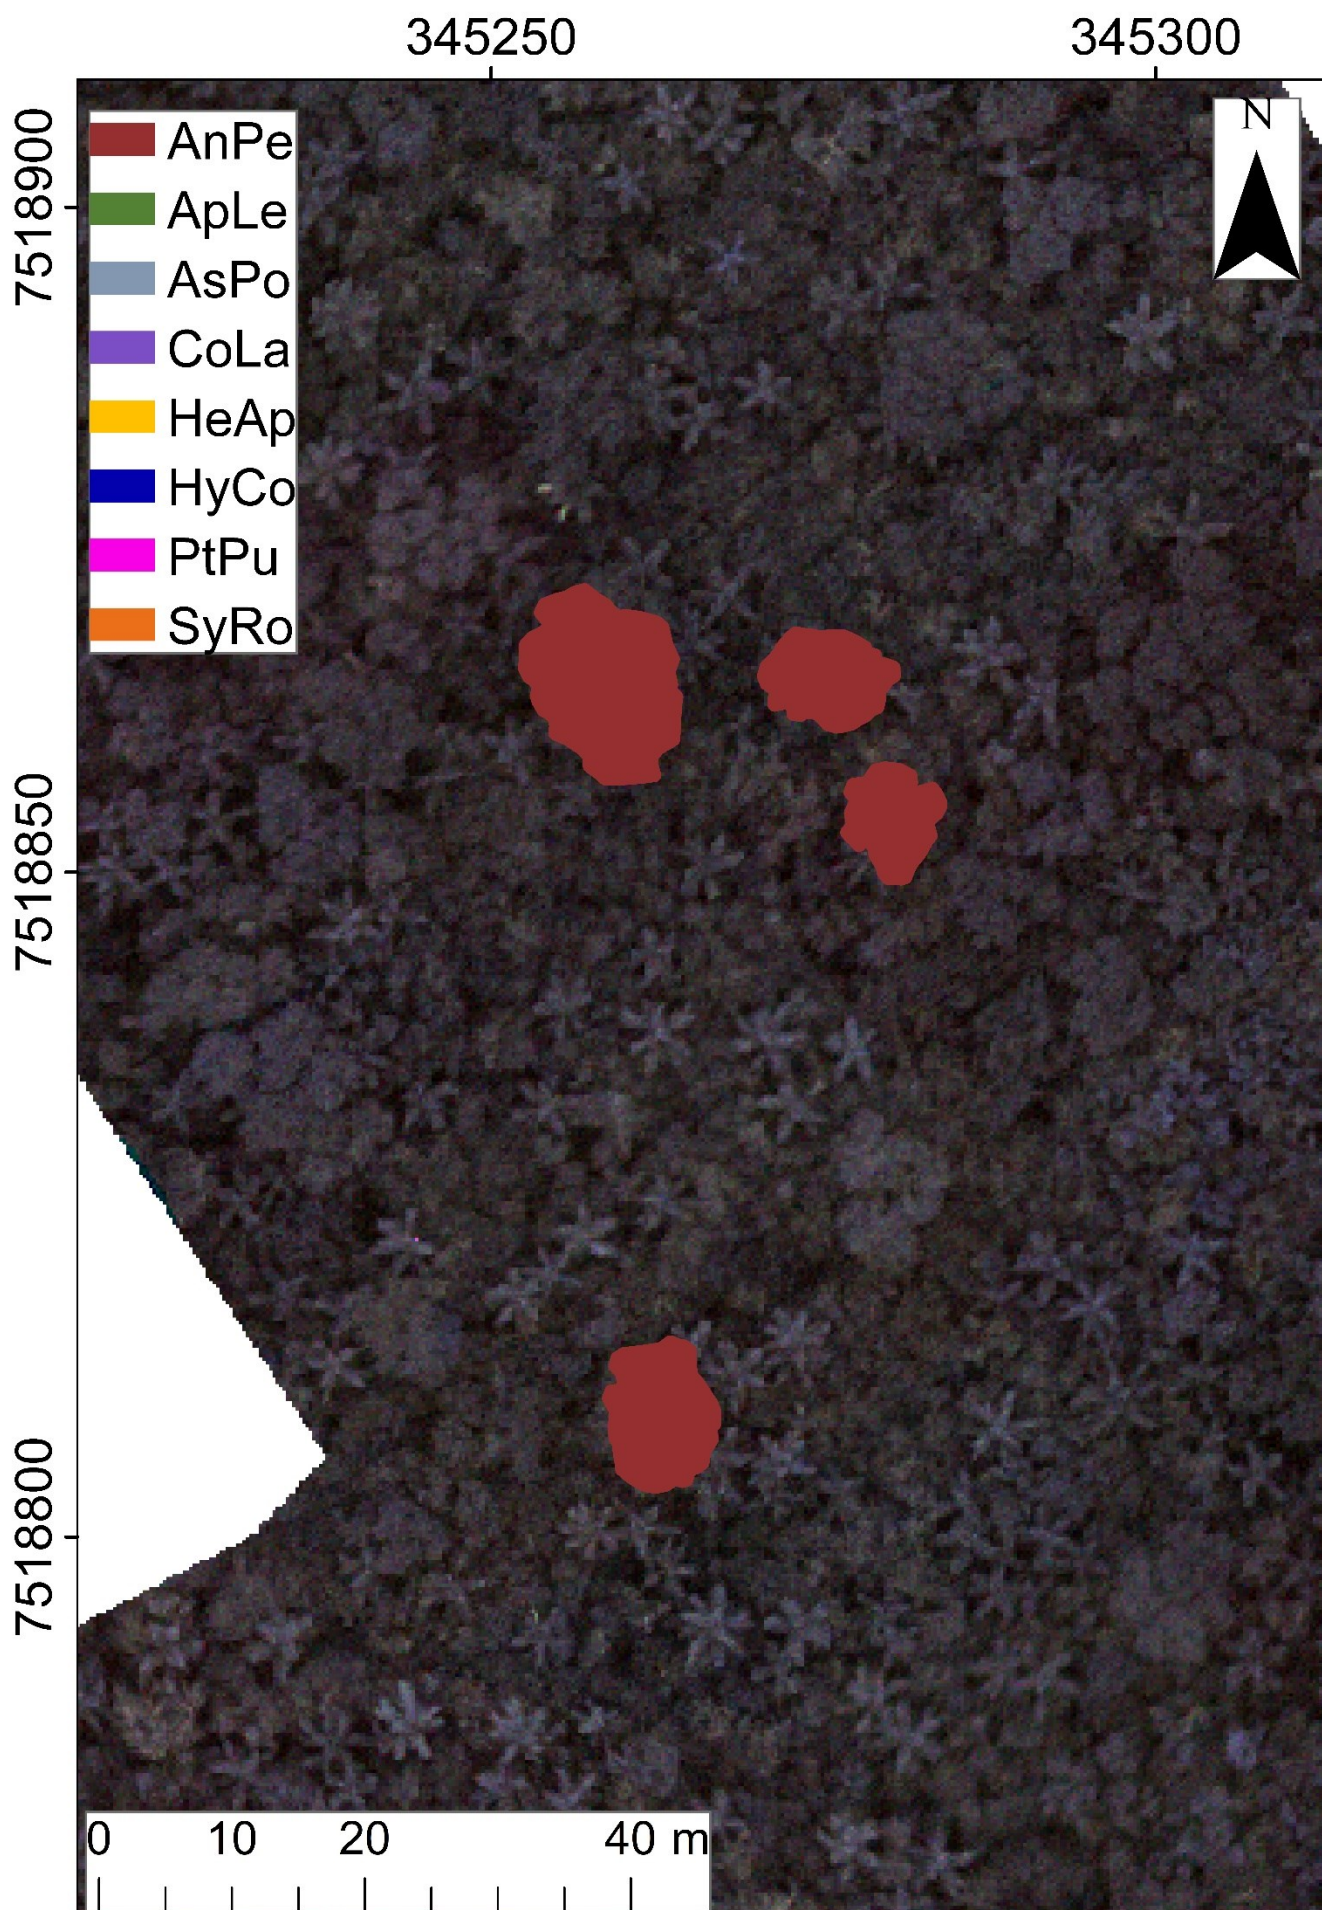



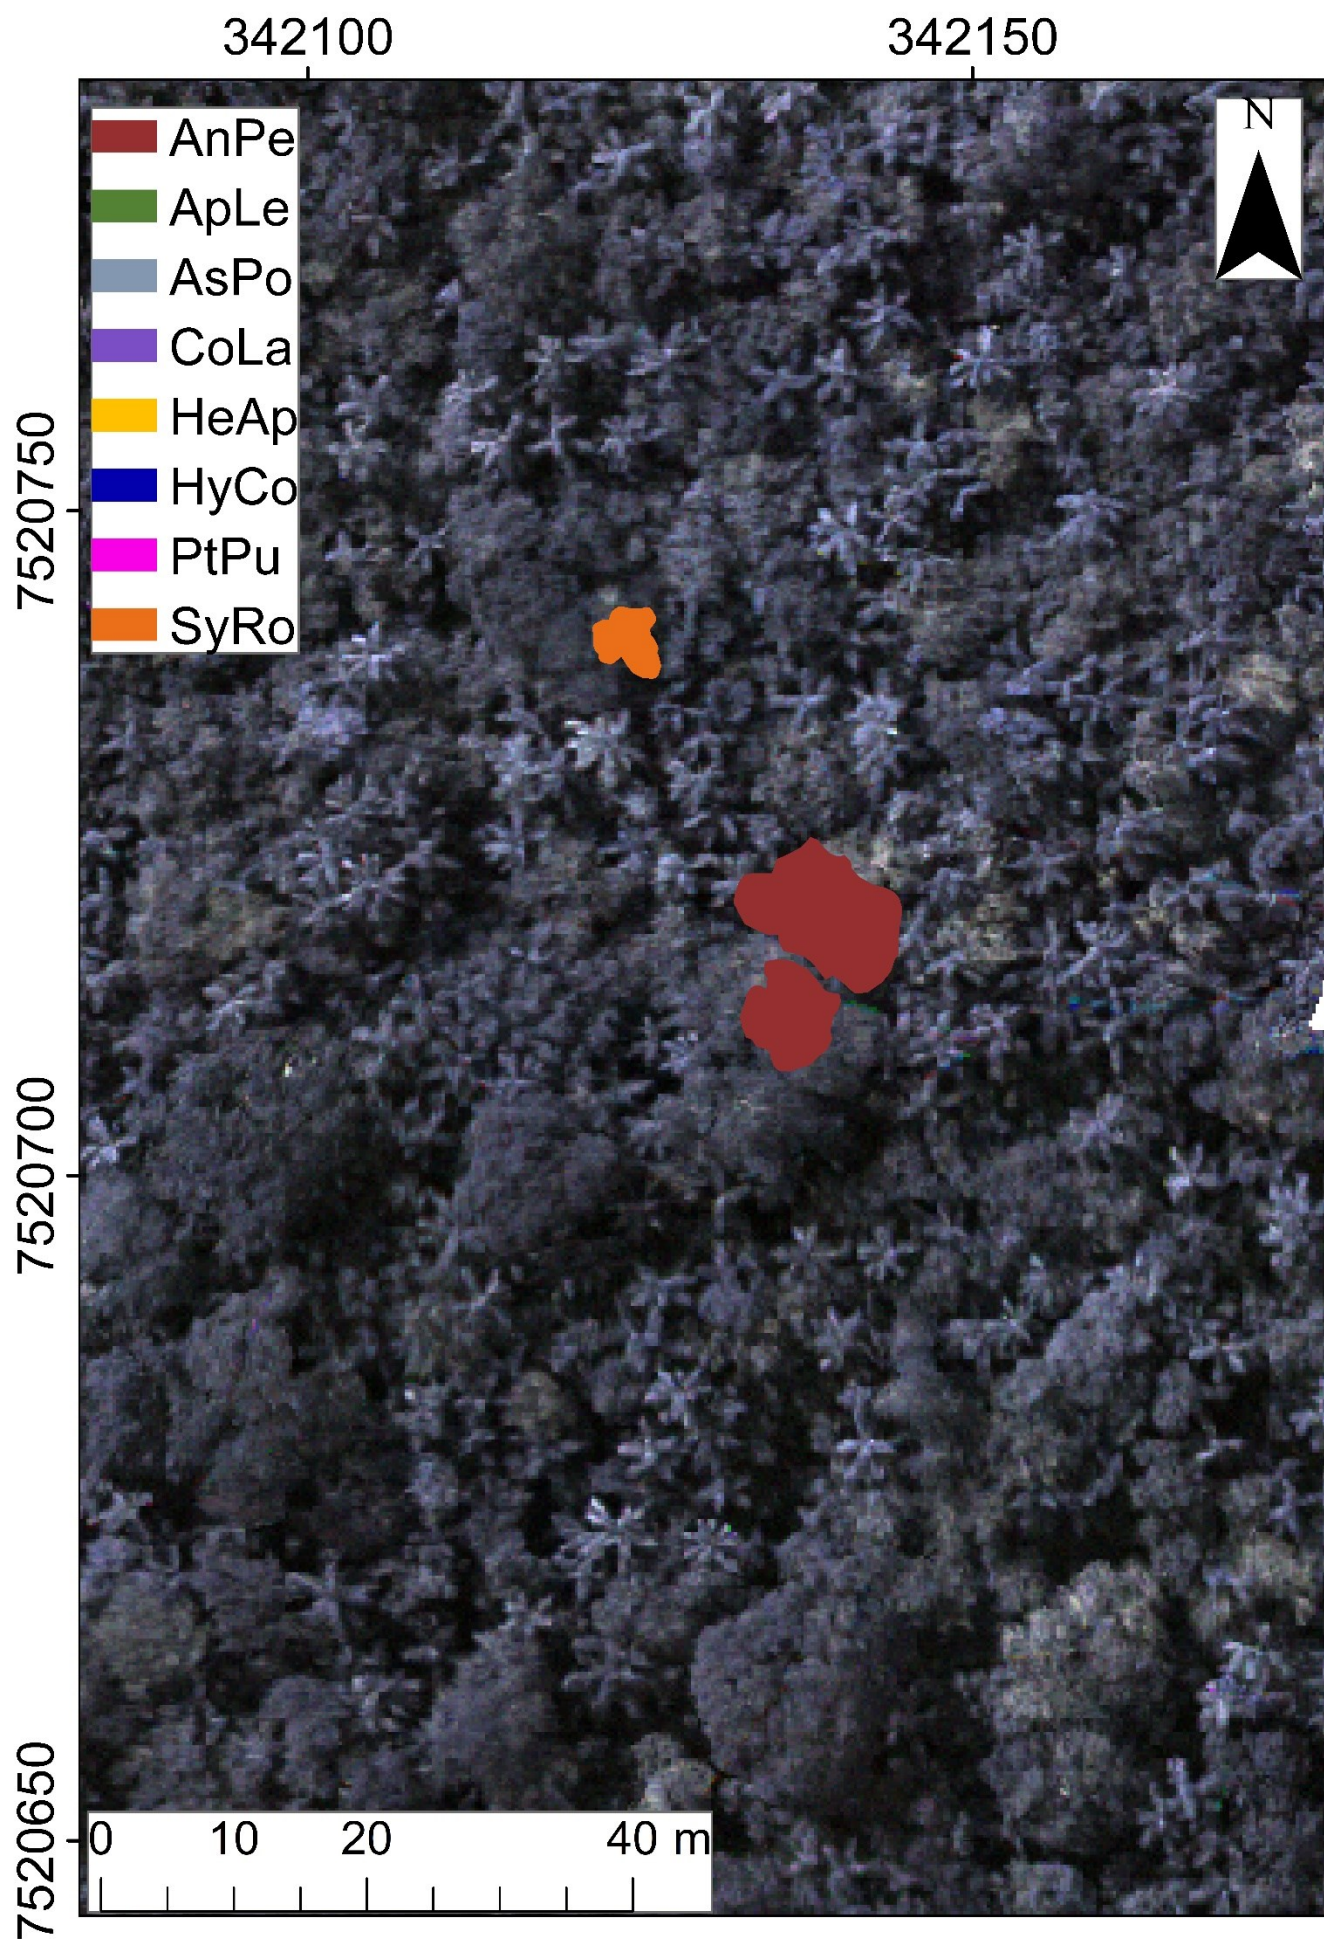

Supplement: s1 [file s1]
